# Supplementary material for: Detection and activation of HIV broadly neutralizing antibody precursor B cells using anti-idiotypes
Source: PubMed Central journal article supplement — J Exp Med. 2019 Jul 25;216(10):2331–47. doi: 10.1084/jem.20190164 (PMC6780997; doi:10.1084/jem.20190164), 2019-07-25
Supplement: JEM_20190164_sm.pdf [file JEM_20190164_sm.pdf]

## Supplemental material

Bancroft et al., <https://doi.org/10.1084/jem.20190164>

Tables S1–S5 are provided online as five separate Excel files. Table S1 contains sequence information for the control antibodies used in Fig. 1 C. Table S2 contains sequence information for the heavy and light chain sequences derived from B cells binding the IB1/2/3 tetramer cocktail. Table S3 contains sequence information for the heavy and light chain sequences derived from human B cells binding the IB2 tetramers. Table S4 contains sequence information for the heavy and light chain sequences derived from human B cells binding the IB3 tetramers. Table S5 contains data collection and refinement statistics for the crystal structures shown in Fig. 2.
